# Supplementary material for: Microplastics and anthropogenic fibre concentrations in lakes reflect surrounding land use
Source: PubMed Central journal article supplement (PMC8439457; doi:10.1371/journal.pbio.3001389), 2021-09-14

(a)  $\sigma = 0.2\mu$ 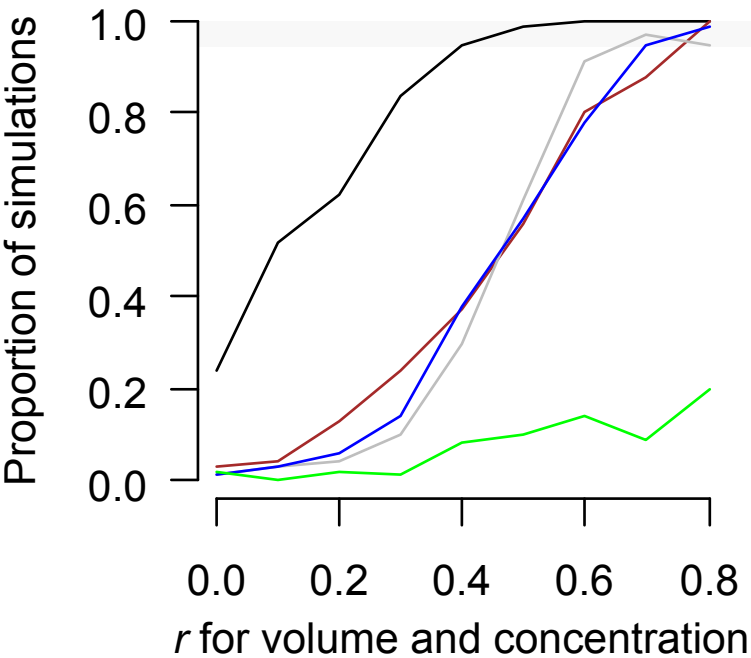(b)  $\sigma = 0.4\mu$ 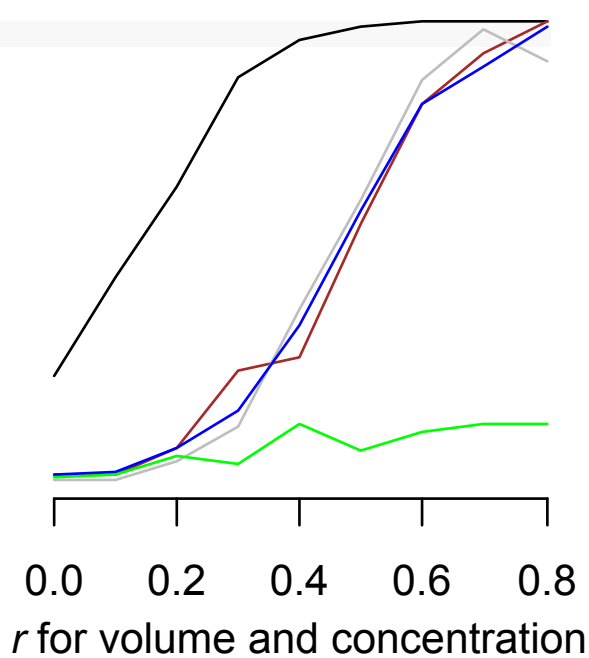

Supplement: pbio.3001389.s001.pdf [file pbio.3001389.s001.pdf]
