# Supplementary material for: Microplastics and anthropogenic fibre concentrations in lakes reflect surrounding land use
Source: PubMed Central journal article supplement (PMC8439457; doi:10.1371/journal.pbio.3001389), 2021-09-14

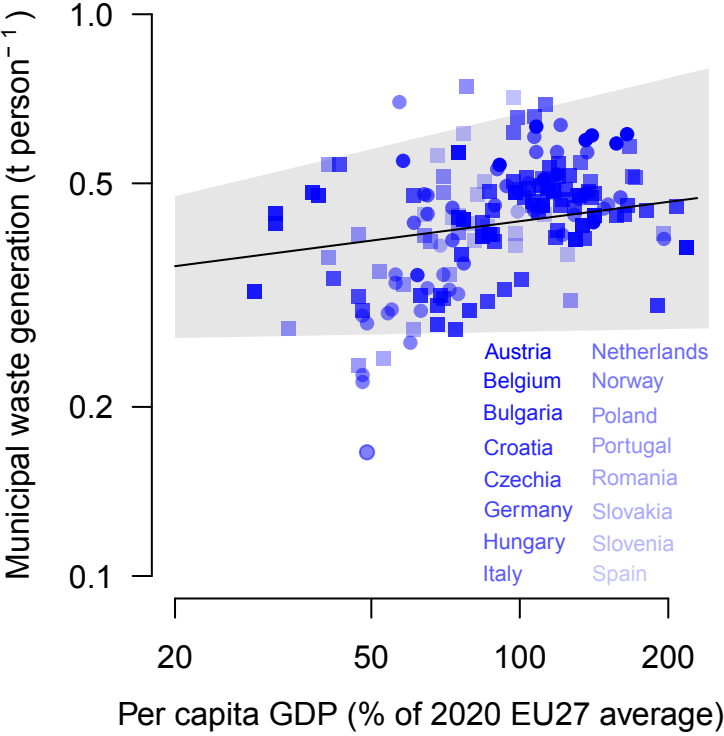

Supplement: pbio.3001389.s002.pdf [file pbio.3001389.s002.pdf]
